# Supplementary material for: A Computational Screen for Regulators of Oxidative Phosphorylation Implicates SLIRP in Mitochondrial RNA Homeostasis
Source: PubMed Central journal article supplement (PMC2721412; doi:10.1371/journal.pgen.1000590), 2009-08-14

Figure S4

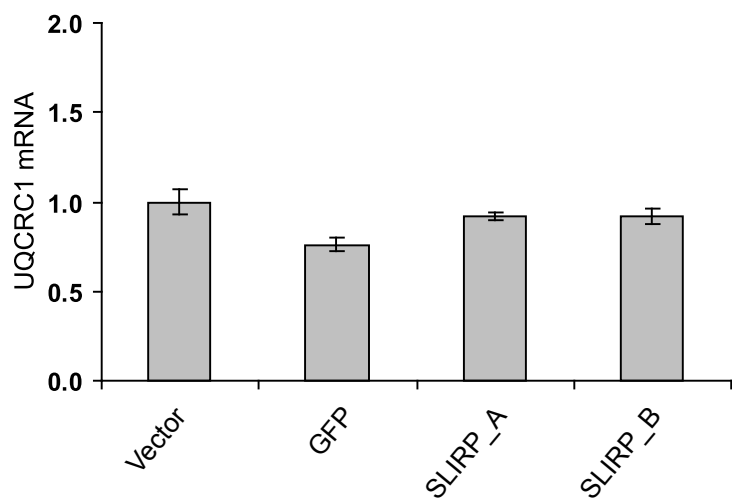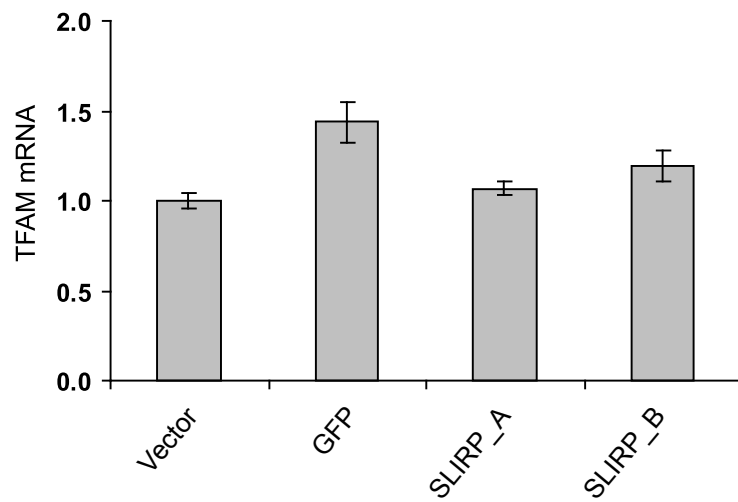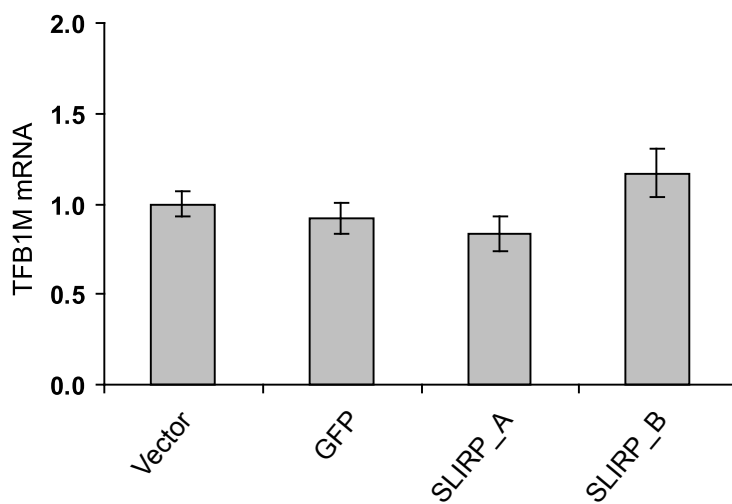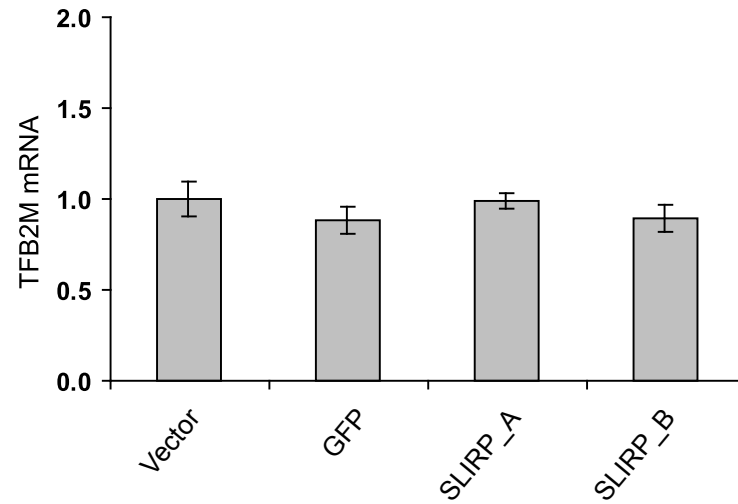

Supplement: pgen.1000590.s004.pdf [file pgen.1000590.s004.pdf]
